# Supplementary material for: Harnessing mtDNA variation to resolve ambiguity in ‘Redfish’ sold in Europe
Source: PeerJ. 2017 Oct 2;5:e3746. doi: 10.7717/peerj.3746 (PMC5628605; doi:10.7717/peerj.3746)
Supplement: Supplemental Information 1 [file peerj-05-3746-s001.xlsx]

## Sheet: peerj-17306-Shum_et_al_suppleme
sample_code	genus	species	sub-species	collection_date	country	nucleotides_DLOOP	genbank_assession_DLOOP	nucleotides_COI	genbank_assession_COI	reference
Bergen_1	Sebastes	norvegicus	NA	2015-04-30	Norway, Bergen	GTCCCTCACCTTCAATAACCGTTGGCATTAAGAAATGGACTTGTTGGTCGGCTCTTACTACATTAAATATTTGAGTTTGATAGGATTTTGAGTAAAGGTATAACTTAACTTATGAGTGTTTGTGTTCGGTCTTAAATTTCGCTTGGTATTTATAAGTGTTTGTTAGTCTTATTATTTTACTTTATGTAAAATGTTCGTGTCGTATAATACTTGAATGGTTAAATTCTATATATGGTGATAATACATTTATGTATATGAATGCCCTATGATATGGTTAATATAAATTAATGGTGATAATACATATATGTATATGAAATATTGTACATACACTACAAAGAATAGTTTAACTAAGAATCCTGGCTTTGGGAGTCAGGGGTGG	MF352036	GGTATAGTAGGCACAGCCCTCAGCCTACTCATTCGAGCAGAACTAAGCCAACCGGGCGCTCTCCTTGGAGACGACCAAATTTATAATGTAATCGTTACAGCACATGCCTTCGTAATGATTTTCTTTATAGTAATGCCAATTATAATTGGAGGTTTTGGAAACTGATTAATTCCGCTAATGATTGGAGCCCCAGATATAGCATTTCCTCGTATAAATAACATAAGTTTCTGACTTCTGCCCCCTTCTTTCCTACTACTACTTGCCTCTTCTGGAGTAGAAGCGGGGGCCGGAACCGGGTGAACAGTGTACCCGCCCCTGGCTGGTAATTTAGCCCACGCAGGAGCATCAGTCGACCTGACAATCTTTTCACTTCACCTAGCAGGTATTTCCTCAATCCTC…	MF352091	this study
Bergen_2	Sebastes	mentella	deep-pelagic	2016-04-30	Norway, Bergen	GTCCCTCACCTTCAATAACCGTTGGCATTAAGAAATGGACTTGTTGGTCGGCTCTTACTACATTAAATATTTGAGTTTGATAGGATTTTGAGTAAAGGTATAACTTAACTTATGAGTGTTTGTGTTCGGTCTTAAATATTCGCTTGGTATTTATAAGTATTTGCTAGTCTTATTATTTTACTTTATGTAATATGTTCGTGTCGTATAATACTTGAATGGTTAAATTCTATATATGGTGATAATACATATATGTATATGAATGCCCTATGATATGGTTAATATAAATTAATGGTGATAATACATATATGTATATGAAATATTGTACATACATTACAAAGAATAGTTTAACTAAGAATCCTGGCTTTGGGAGTCAGGGGTGGGAGTTAAAATCTCCTTTCT…	MF352037	GGTATAGTAGGCACAGCCCTCAGCCTACTCATTCGAGCAGAACTAAGCCAACCGGGCGCTCTCCTTGGAGACGACCAAATTTATAATGTAATCGTTACAGCACATGCCTTCGTAATGATTTTCTTTATAGTAATGCCAATTATAATTGGAGGTTTTGGAAACTGATTAATTCCGCTAATGATTGGAGCCCCAGATATAGCATTTCCTCGTATAAATAACATAAGTTTCTGACTTCTACCCCCTTCTTTCCTACTACTACTTGCCTCTTCTGGAGTAGAAGCGGGGGCCGGAACCGGGTGAACAGTGTACCCGCCCCTGGCTGGTAATTTAGCCCACGCAGGAGCATCAGTCGACCTGACAATCTTTTCACTTCACCTAGCAGGTATTTCCTCAATCCTC…	MF352092	this study
Oslo_3	Sebastes	mentella	shallow-pelagic	2015-05-03	Norway, Oslo	GTCCCTCACCTTCAATAACCGTTGGCATTAAGAAATGGACTTGTTGGTCGGCTCTTACTACATTAAATATTTGAGTTTGATAGGATTTTGAGTAAAGGTATAACTTAACTTATGAGTGTTTGTGTTCGGTCTTAAATATTCGCTTGGTATTTATAAGTATTTGCTAGTCTTATTATTTTACTTTATGTAATATTTTCGTGTCGTATAATACTTGAATGGTTAAATCCTATATATGGTGATAATACATATATGTATATGAATGCCCTATGATATGGTTAATATAAATTAATGGTGATAATACATATATGTATATGAAATATTGTACATATATTACAAAGAATAGTTTAACTAAGAATCCTGGCTTTGGGAGTCAGGGGTGGGAGTTAAAATCTCCTTTCT…	MF352038	GGTATAGTAGGCACAGCCCTCAGCCTACTCATTCGAGCAGAACTAAGCCAACCGGGCGCTCTCCTTGGAGACGACCAAATTTATAATGTAATCGTTACAGCACATGCCTTCGTAATGATTTTCTTTATAGTAATGCCAATTATAATTGGAGGTTTTGGAAACTGATTAATTCCGCTAATGATTGGAGCCCCAGATATAGCATTTCCTCGTATAAATAACATAAGTTTCTGACTTCTACCCCCTTCTTTCCTACTACTACTTGCCTCTTCTGGAGTAGAAGCGGGGGCCGGAACCGGGTGAACAGTGTACCCGCCCCTGGCTGGTAATTTAGCCCACGCAGGAGCATCAGTCGACCTGACAATCTTTTCACTTCACCTAGCAGGTATTTCCTCAATCCTC…	MF352093	this study
Liverpool_1	Sebastes	norvegicus	NA	2015-04-01	United Kingdom, Liverpool	GTCCCTCACCTTCAATAACCGTTGGCATTAAGAAATGGACTTGTTGGTCGGCTCTTACTACATTAAATATTTGAGTTTGATAGGATTTTGAGTAAAGGTATAACTTAACTTATGAGTGTTTGTGTTCGGTCTTAAATTTCGCTTGGTATTTATAAGTGTTTGTTAGTCTTATTATTTTACTTTATGTAAAATGTTCGTGTCGTATAATACTTGAATGGTTAAATTCTATATATGGTGATAATACATTTATGTATATGAATGCCCTATGATATGGTTAATATAAATTAATGGTGATAATACATATATGTATATGAAATATTGTACATACATTACAAAGAATAGTTTAACTAAGAATCCTGGCTTTGGGAGTCAGGGGTGGGAGTTAAAATCTCCTTTCTT…	MF352039	GGTATAGTAGGCACAGCCCTCAGCCTACTCATTCGAGCAGAACTAAGCCAACCGGGCGCTCTCCTTGGAGACGACCAAATTTATAATGTAATCGTTACAGCACATGCCTTCGTAATGATTTTCTTTATAGTAATGCCAATTATAATTGGAGGTTTTGGAAACTGATTAATTCCGCTAATGATTGGAGCCCCAGATATAGCATTTCCTCGTATAAATAACATAAGTTTCTGACTTCTGCCCCCTTCTTTCCTACTACTACTTGCCTCTTCTGGAGTAGAAGCGGGGGCCGGAACCGGGTGAACAGTGTACCCGCCCCTGGCTGGTAATTTAGCCCACGCAGGAGCATCAGTCGACCTGACAATCTTTTCACTTCACCTAGCAGGTATTTCCTCAATCCTC…	MF352094	this study
Liverpool_2	Sebastes	norvegicus	NA	2015-04-01	United Kingdom, Liverpool	GTCCCTCACCTTCAATAACCGTTGGCATTAAGAAATGGACTTGTTGGTCGGCTCTTACTACATTAAATATTTGAGTTTGATAGGATTTTGAGTAAAGGTATAACTTAACTTATGAGTGTTTGTGTTCGGTCTTAAATTTCGCTTGGTATTTATAAGTGTTTGTTAGTCTTATTATTTTACTTTATGTAAAATGTTCGTGTCGTATAATACTTGAATGGTTAAATTCTATATATGGTGATAATACATTTATGTATATGAATGCCCTATGATATGGTTAATATAAATTAATGGTGATAATACATATATGTATATGAAATATTGTACATACATTACAAAGAATAGTTTAACTAAGAATCCTGGCTTTGGGAGTCAGGGGTGGGAGTTAAAATCTCCTTTCTT…	MF352040	GGTATAGTAGGCACAGCCCTCAGCCTACTCATTCGAGCAGAACTAAGCCAACCGGGCGCTCTCCTTGGAGACGACCAAATTTATAATGTAATCGTTACAGCACATGCCTTCGTAATGATTTTCTTTATAGTAATGCCAATTATAATTGGAGGTTTTGGAAACTGATTAATTCCGCTAATGATTGGAGCCCCAGATATAGCATTTCCTCGTATAAATAACATAAGTTTCTGACTTCTGCCCCCTTCTTTCCTACTACTACTTGCCTCTTCTGGAGTAGAAGCGGGGGCCGGAACCGGGTGAACAGTGTACCCGCCCCTGGCTGGTAATTTAGCCCACGCAGGAGCATCAGTCGACCTGACAATCTTTTCACTTCACCTAGCAGGTATTTCCTCAATCCTC…	MF352095	this study
Liverpool_3	Sebastes	norvegicus	NA	2015-04-01	United Kingdom, Liverpool	GTCCCTCACCTTCAATAACCGTTGGCATTAAGAAATGGACTTGTTGGTCGGCTCTTACTACATTAAATATTTGAGTTTGATAGGATTTTGAGTAAAGGTATAACTTAACTTATGAGTGTTTGTGTTCGGTCTTAAATTTCGCTTGGTATTTATAAGTGTTTGTTAGTCTTATTATTTTACTTTATGTAAAATGTTCGTGTCGTATAATACTTGAATGGTTAAATTCTATATATGGTGATAATACATTTATGTATATGAATGCCCTATGATATGGTTAATATAAATTAATGGTGATAATACATATATGTATATGAAATATTGTACATACATTACAAAGAATAGTTTAACTAAGAATCCTGGCTTTGGGAGTCAGGGGTGGGAGTTAAAATCTCCTTTCTT…	MF352041	GGTATAGTAGGCACAGCCCTCAGCCTACTCATTCGAGCAGAACTAAGCCAACCGGGCGCTCTCCTTGGAGACGACCAAATTTATAATGTAATCGTTACAGCACATGCCTTCGTAATGATTTTCTTTATAGTAATGCCAATTATAATTGGAGGTTTTGGAAACTGATTAATTCCGCTAATGATTGGAGCCCCAGATATAGCATTTCCTCGTATAAATAACATAAGTTTCTGACTTCTGCCCCCTTCTTTCCTACTACTACTTGCCTCTTCTGGAGTAGAAGCGGGGGCCGGAACCGGGTGAACAGTGTACCCGCCCCTGGCTGGTAATTTAGCCCACGCAGGAGCATCAGTCGACCTGACAATCTTTTCACTTCACCTAGCAGGTATTTCCTCAATCCTC…	MF352096	this study
Liverpool_4	Sebastes	norvegicus	NA	2015-04-01	United Kingdom, Liverpool	GTCCCTCACCTTCAATAACCGTTGGCATTAAGAAATGGACTTGTTGGTCGGCTCTTACTACATTAAATATTTGAGTTTGATAGGATTTTGAGTAAAGGTATAACTTAACTTATGAGTGTTTGTGTTCGGTCTTAAATTTCGCTTGGTATTTATAAGTGTTTGTTAGTCTTATTATTTTACTTTATGTAAAATGTTCGTGTCGTATAATACTTGAATGGTTAAATTCTATATATGGTGATAATACATTTATGTATATGAATGCCCTATGATATGGTTAATATAAATTAATGGTGATAATACATATATGTATATGAAATATTGTACATACATTACAAAGAATAGTTTAACTAAGAATCCTGGCTTTGGGAGTCAGGGGTGGGAGTTAAAATCTCCTTTCTT…	MF352042	GGTATAGTAGGCACAGCCCTCAGCCTACTCATTCGAGCAGAACTAAGCCAACCGGGCGCTCTCCTTGGAGACGACCAAATTTATAATGTAATCGTTACAGCACATGCCTTCGTAATGATTTTCTTTATAGTAATGCCAATTATAATTGGAGGTTTTGGAAACTGATTAATTCCGCTAATGATTGGAGCCCCAGATATAGCATTTCCTCGTATAAATAACATAAGTTTCTGACTTCTGCCCCCTTCTTTCCTACTACTACTTGCCTCTTCTGGAGTAGAAGCGGGGGCCGGAACCGGGTGAACAGTGTACCCGCCCCTGGCTGGTAATTTAGCCCACGCAGGAGCATCAGTCGACCTGACAATCTTTTCACTTCACCTAGCAGGTATTTCCTCAATCCTC…	MF352097	this study
Liverpool_5	Sebastes	norvegicus	NA	2015-04-01	United Kingdom, Liverpool	GTCCCTCACCTTCAATAACCGTTGGCATTAAGAAATGGACTTGTTGGTCGGCTCTTACTACATTAAATATTTGAGTTTGATAGGATTTTGAGTAAAGGTATAACTTAACTTATGAGTGTTTGTGTTCGGTCTTAAATTTCGCTTGGTATTTATAAGTGTTTGTTAGTCTTATTATTTTACTTTATGTAAAATGTTCGTGTCGTATAATACTTGAATGGTTAAATTCTATATATGGTGATAATACATTTATGTATATGAATGCCCTATGATATGGTTAATATAAATTAATGGTGATAATACATATATGTATATGAAATATTGTACATACATTACAAAGAATAGTTTAACTAAGAATCCTGGCTTTGGGAGTCAGGGGTGGGAGTTAAAATCTCCTTTCTT…	MF352043	GGTATAGTAGGCACAGCCCTCAGCCTACTCATTCGAGCAGAACTAAGCCAACCGGGCGCTCTCCTTGGAGACGACCAAATTTATAATGTAATCGTTACAGCACATGCCTTCGTAATGATTTTCTTTATAGTAATGCCAATTATAATTGGAGGTTTTGGAAACTGATTAATTCCGCTAATGATTGGAGCCCCAGATATAGCATTTCCTCGTATAAATAACATAAGTTTCTGACTTCTGCCCCCTTCTTTCCTACTACTACTTGCCTCTTCTGGAGTAGAAGCGGGGGCCGGAACCGGGTGAACAGTGTACCCGCCCCTGGCTGGTAACTTAGCCCACGCAGGAGCATCAGTCGACCTGACAATCTTTTCACTTCACCTAGCAGGTATTTCCTCAATCCTC…	MF352098	this study
Munich_1	Sebastes	mentella	shallow-pelagic	2015-06-25	Germany, Munich	GTCCCTCACCTTCAATAACCGTTGGCATTAAGAAATGGACTTGTTGGTCGGCTCTTACTACATTAAATATTTGAGTTTGATAGGATTTTGAGTAAAGGTATAACTTAACTTATGAGTGTTTGTGTTCGGTCTTAAATATTCGCTTGGTATTTATAAGTATTTGCTAGTCTTATTATTTTACTTTATGTAAGATGTTCGTGTCGTATAATACTTGAATGGTTAAATCCTATATATGGTGATAATACATATATGTATATGAATGCCCTATGATATGGTTAATATAAATTAATGGTGATAATACATATATGTATATGAAATATTGTACATATATTACAAAGAATAGTTTAACTAAGAATCCTGGCTTTGGGAGTCAGGGGTGGGAGTTAAAATTTTTTTTCT…	MF352044	NA	NA	this study
Munich_2	Sebastes	mentella	shalow-pelagic	2015-06-25	Germany, Munich	GTCCCTCACCTTCAATAACCGTTGGCATTAAGAAATGGACTTGTTGGTCGGCTCTTACTACATTAAATATTTGAGTTTGATAGGATTTTGAGTAAAGGTATAACTTAACTTATGAGTGTTTGTGTTCGGTCTTAAATATTCGCTTGGTATTTATAAGTGTTTGCTAGTCTTATTATTTTACTTTATGTAAGATGTTCGTGTCGTATAATACTTGAATGGTTAAATCCTATATATGGTGATAATACATATATGTATATGAATGCCCTATGATATGGTTAATATAAATTAATGGTGATAATACATATATGTATATGAAATATTGTACATATATTACAAAGAATAGTTTAACTAAGAATCCTGGCTTTGGGAGTCAGGGGTGGGAGTTAAAATCTCCTTTCT…	MF352045	NA	NA	this study
Munich_3	Sebastes	mentella	deep-pelagic	2015-06-25	Germany, Munich	GTCCCTCACCTTCAATAACCGTTGGCATTAAGAAATGGACTTGTTGGTCGGCTCTTACTACATTAAATATTTGAGTTTGATAGGATTTTGAGTAAAGGTATAACTTAACTTATGAGTGTTTGTGTTCGGTCTTAAATATTCGCTTGGTATTTATAAGTATTTGCTAGTCTTATTATTTTACTTTATGTAATATGTTCGTGTCGTATAATACTTGAATGGTTAAATTCTATATATGGTGATAATACATATATGTATATGAATGCCCTATGATATGGTTAATATAAATTAATGGTGATAATACATATATGTATATGAAATATTGTACATACATTACAAAGAATAGTTTAACTAAGAATCCTGGCTTTGGGAGTCAGGGGTGGGAGTTAAAATCTCCTTTCT…	MF352046	GGTATAGTAGGCACAGCCCTCAGCCTACTCATTCGAGCAGAACTAAGCCAACCGGGCGCTCTCCTTGGAGACGACCAAATTTATAATGTAATCGTTACAGCACATGCCTTCGTAATGATTTTCTTTATAGTAATGCCAATTATAATTGGAGGTTTTGGAAACTGATTAATTCCGCTAATGATTGGAGCCCCAGATATAGCATTTCCTCGTATAAATAACATAAGTTTCTGACTTCTACCCCCTTCTTTCCTACTACTACTTGCCTCTTCTGGAGTAGAAGCGGGGGCCGGAACCGGGTGAACAGTGTACCCGCCCCTGGCTGGTAATTTAGCCCACGCAGGAGCATCAGTCGACCTGACAATCTTTTCACTTCACCTAGCAGGTATTTCCTCAATCCTC…	MF352099	this study
Munich_4	Sebastes	mentella	deep-pelagic	2015-06-25	Germany, Munich	GTCCCTCACCTTCAATAACCGTTGGCATTAAGAAATGGACTTGTTGGTCGGCTCTTACTACATTAAATATTTGAGTTTGATAGGATTTTGAGTAAAGGTATAACTTAACTTATGAGTGTTTGTGTTCGGTCTTAAATATTCGCTTGGTATTTATAAGTATTTGCTAGTCTTATTATTTTACTTTATGTAATATGTTCGTGTCGTATAATACTTGAATGGTTAAATTCTATATATGGTGATAATACATATATGTATATGAATGCCCTATGATATGGTTAATATAAATTAATGGTGATAATACATATATGTATATGAAATATTGTACATACATTACAAAGAATAGTTTAACTAAGAATCCTGGCTTTGGGAGTCAGGGGTGG	MF352047	GGTATAGTAGGCACAGCCCTCAGCCTACTCATTCGAGCAGAACTAAGCCAACCGGGCGCTCTCCTTGGAGACGACCAAATTTATAATGTAATCGTTACAGCACATGCCTTCGTAATGATTTTCTTTATAGTAATGCCAATTATAATTGGAGGTTTTGGAAACTGATTAATTCCGCTAATGATTGGAGCCCCAGATATAGCATTTCCTCGTATAAATAACATAAGTTTCTGACTTCTACCCCCTTCTTTCCTACTACTACTTGCCTCTTCTGGAGTAGAAGCGGGGGCCGGAACCGGGTGAACAGTGTACCCGCCCCTGGCTGGTAATTTAGCCCACGCAGGAGCATCAGTCGACCTGACAATCTTTTCACTTCACCTAGCAGGTATTTCCTCAATCCTC…	MF352100	this study
Hamburg_1	Sebastes	mentella	shallow-pelagic	2015-08-03	Germany, Hamburg	GTCCCTCACCTTCAATAACCGTTGGCATTAAGAAATGGACTTGTTGGTCGGCTCTTACTACATTAAATATTTGAGTTTGATAGGATTTTGAGTAAAGGTATAACTTAACTTATGAGTGTTTGTGTTCGGTCTTAAATATTCGCTTGGTATTTATAAGTATTTGCTAGTCTTATTATTTTACTTTATGTAATATGTTCGTGTCGTATAATACTTGAATGGTTAAATTCTATATATGGTGATAATACATATATGTATATGAATGCCCTATGATATGGTTAATATAAATTAATGGTGATAATACATATATGTATATGAAATATTGTACATACATTACAAAGAATGGTTTAACTAAGAATCCTGGCTTTGGGAGTCAGGGGTGGGAGTTAAAATCTCCTTTCT…	MF352048	GGTATAGTAGGCACAGCCCTCAGCCTACTCATTCGAGCAGAACTAAGCCAACCGGGCGCTCTCCTTGGAGACGACCAAATTTATAATGTAATCGTTACAGCACATGCCTTCGTAATGATTTTCTTTATAGTAATGCCAATTATAATTGGAGGTTTTGGAAACTGATTAATTCCGCTAATGATTGGAGCCCCAGATATAGCATTTCCTCGTATAAATAACATAAGTTTCTGACTTCTACCCCCTTCTTTCCTACTACTACTTGCCTCTTCTGGAGTAGAAGCGGGGGCCGGAACCGGGTGAACAGTGTACCCGCCCCTGGCTGGTAATTTAGCCCACGCAGGAGCATCAGTCGACCTGACAATCTTTTCACTTCACCTAGCAGGTATTTCCTCAATCCTC…	MF352101	this study
Hamburg_2	Sebastes	NA	NA	2015-07-15	Germany, Hamburg	GTCCCTCACCTTCAATAACCGTTGGCATTAAGAAATGGACTTGTTGGTCGGCTCTTACTACATTAAATATTTGAGTTTGACGGAATTTTGAGTAAAGGTATAACTTGACTTATGAGTGTTTGTGTTAGGTCTTAAGTTTCGTCCGGTGTTTGTAAGTGTTTGTTAGTCTTATTATCTTGCTTTATGTAAAATATTCGTGTCGTATAATACTTGAATGGTTAAACCCTAGATATGGTGATAAAACATAGATGTACTTGAATGCTATATGATATGGTTAATATAAATTAATGTTGATAATACATATATGTATATGAAATTATTGTACATATACTACAAAGAATAGTTTAACTAAGAATCCTGGCTTTGGGAGCCAGGGGTGGGAGTTAAAATCTCCTTTCT…	MF352049	GGTATAGTAGGCACAGCCCTCAGCCTACTCATTCGAGCAGAACTAAGCCAACCGGGCGCTCTCCTTGGAGACGACCAAATTTATAATGTAATCGTTACAGCACATGCCTTCGTAATGATTTTCTTTATAGTAATGCCAATTATAATTGGAGGTTTTGGAAATTGATTAATTCCCCTAATGATTGGAGCCCCAGATATAGCATTTCCTCGTATAAATAACATAAGTTTCTGACTTCTACCCCCTTCTTTCCTACTACTACTTGCCTCTTCTGGAGTAGAAGCGGGTGCCGGAACCGGGTGAACAGTGTACCCGCCCCTGTCTGGTAATTTAGCCCACGCAGGAGCATCAGTCGACCTGACAATCTTTTCACTTCACCTAGCAGGTATTTCCTCAATCCTC…	MF352102	this study
Hamburg_3	Sebastes	norvegicus	NA	2015-07-15	Germany, Hamburg	GTCCCTCACCTTCAATAACCGTTGGCATTAAGAAATGGACTTGTTGGTCGGCTCTTACTACATTAAATATTTGAGTTTGATAGGATTTTGAGTAAAGGTATAACTTAACTTATGAGTGTTTGTGTTCGGTCTTAAATTTCGCTTGGTATTTATAAGTGTTTGTTAGTCTTATTATTTTACTTTATGTAAAATGTTCGTGTCGTATAATACTTGAATGGTTAAATTCTATATATGGTGATAATACATTTATGTATATGAATGCCCTATGATATGGTTAATATAAATTAATGGTGATAATACATATATGTATATGAAATATTGTACATACATTACAAAGAATAGTTTAACTAAGAATCCTGGCTTTGGGAGTCAGGGGTGGGAGTTAAAATCTCCTTTCTT…	MF352050	GGTATAGTAGGCACAGCCCTCAGCCTACTCATTCGAGCAGAACTAAGCCAACCGGGCGCTCTCCTTGGAGACGACCAAATTTATAATGTAATCGTTACAGCACATGCCTTCGTAATGATTTTCTTTATAGTAATGCCAATTATAATTGGAGGTTTTGGAAACTGATTAATTCCGCTAATGATTGGAGCCCCAGATATAGCATTTCCTCGTATAAATAACATAAGTTTCTGACTTCTGCCCCCTTCTTTCCTACTACTACTTGCCTCTTCTGGAGTAGAAGCGGGGGCCGGAACCGGGTGAACAGTGTACCCGCCCCTGGCTGGTAATTTAGCCCACGCAGGAGCATCAGTCGACCTGACAATCTTTTCACTTCACCTAGCAGGTATTTCCTCAATCCTC…	MF352103	this study
Hamburg_4	Sebastes	norvegicus	NA	2015-07-15	Germany, Hamburg	GTCCCTCACCTTCAATAACCGTTGGCATTAAGAAATGGACTTGTTGGTCGGCTCTTACTACATTAAATATTTGAGTTTGATAGGATTTTGAGTAAAGGTATAACTTAACTTATGAGTGTTTGTGTTCGGTCTTAAATTTCGCTTGGTATTTATAAGTGTTTGTTAGTCTTATTATTTTACTTTATGTAAAATGTTCGTGTCGTATAATACTTGAATGGTTAAATTCTATATATGGTGATAATACATTTATGTATATGAATGCCCTATGATATGGTTAATATAAATTAATGGTGATAATACATATATGTATATGAAATATTGTACATACATTACAAAGAATAGTTTAACTAAGAATCCTGGCTTTGGGAGTCAGGGGTGGGAGTTAAAATCTCCTTTCTT…	MF352051	GGTATAGTAGGCACAGCCCTCAGCCTACTCATTCGAGCAGAACTAAGCCAACCGGGCGCTCTCCTTGGAGACGACCAAATTTATAATGTAATCGTTACAGCACATGCCTTCGTAATGATTTTCTTTATAGTAATGCCAATTATAATTGGAGGTTTTGGAAACTGATTAATTCCGCTAATGATTGGAGCCCCAGATATAGCATTTCCTCGTATAAATAACATAAGTTTCTGACTTCTGCCCCCTTCTTTCCTACTACTACTTGCCTCTTCTGGAGTAGAAGCGGGGGCCGGAACCGGGTGAACAGTGTACCCGCCCCTGGCTGGTAATTTAGCCCACGCAGGAGCATCAGTCGACCTGACAATCTTTTCACTTCACCTAGCAGGTATTTCCTCAATCCTC…	MF352104	this study
Leuven_1	Sebastes	norvegicus	NA	2015-07-30	Belgium, Leuven	GTCCCTCACCTTCAATAACCGTTGGCATTAAGAAATGGACTTGTTGGTCGGCTCTTACTACATTAAATATTTGAGTTTGATAGGATTTTGAGTAAAGGTATAACTTAACTTATGAGTGTTTGTGTTCGGTCTTAAATTTCGCTTGGTATTTATAAGTGTTTGTTAGTCTTATTATTTTACTTTATGTAAAATGTTCGTGTCGTATAATACTTGAATGGTTAAATTCTATATATGGTGATAATACATTTATGTATATGAATGCCCTATGATATGGTTAATATAAATTAATGGTGATAATACATATATGTATATGAAATATTGTACATACATTACAAAGAATAGTTTAACTAAGAATCCTGGCTTTGGGAGTCAGGGGTGGGAGTTAAAATCTCCTTTCTT…	MF352052	GGTATAGTAGGCACAGCCCTCAGCCTACTCATTCGAGCAGAACTAAGCCAACCGGGCGCTCTCCTTGGAGACGACCAAATTTATAATGTAATCGTTACAGCACATGCCTTCGTAATGATTTTCTTTATAGTAATGCCAATTATAATTGGAGGTTTTGGAAACTGATTAATTCCGCTAATGATTGGAGCCCCAGATATAGCATTTCCTCGTATAAATAACATAAGTTTCTGACTTCTGCCCCCTTCTTTCCTACTACTACTTGCCTCTTCTGGAGTAGAAGCGGGGGCCGGAACCGGGTGAACAGTGTACCCGCCCCTGGCTGGTAATTTAGCCCACGCAGGAGCATCAGTCGACCTGACAATCTTTTCACTTCACCTAGCAGGTATTTCCTCAATCCTC…	MF352105	this study
Leuven_2.1	Sebastes	norgegicus	NA	2015-07-30	Belgium, Leuven	GTCCCTCACCTTCAATAACCGTTGGCATTAAGAAATGGACTTGTTGGTCGGCTCTTACTACATTAAATATTTGAGTTTGATAGGATTTTGAGTAAAGGTATAACTTAACTTATGAGTGTTTGTGTTCGGTCTTAAATTTCGCTTGGTATTTATAAGTGTTTGTTAGTCTTATTATTTTACTTTATGTAAAATGTTCGTGTCGTATAATACTTGAATGGTTAAATTCTATATATGGTGATAATACATTTATGTATATGAATGCCCTATGATATGGTTAATATAAATTAATGGTGATAATACATATATGTATATGAAATATTGTACATACATTACAAAGAATAGTTTAACTAAGAATCCTGGCTTTGGGAGTCAGGGGTGGGAGTTAAAATCTCCTTTCTT…	MF352053	GGTATAGTAGGCACAGCCCTCAGCCTACTCATTCGAGCAGAACTAAGCCAACCGGGCGCTCTCCTTGGAGACGACCAAATTTATAATGTAATCGTTACAGCACATGCCTTCGTAATGATTTTCTTTATAGTAATGCCAATTATAATTGGAGGTTTTGGAAACTGATTAATTCCGCTAATGATTGGAGCCCCAGATATAGCATTTCCTCGTATAAATAACAAAAGTTTCTGACTTCTGCCCCCTTCTTTCCTACTACTACTTGCCTCTTCTGGAGTAGAAGCGGGGGCCGGAACCGGGTGAACAGTGTACCCGCCCCTGGCTGGTAATTTAGCCCACGCAGGAGCATCAGTCGACCTGACAATCTTTTCACTTCACCTAGCAGGTATTTCCTCAATCCTC…	MF352106	this study
Leuven2.2	Sebastes	norgegicus	NA	2015-07-30	Belgium, Leuven	GTCCCTCACCTTCAATAACCGTTGGCATTAAGAAATGGACTTGTTGGTCGGCTCTTACTACATTAAATATTTGAGTTTGATAGGATTTTGAGTAAAGGTATAACTTAACTTATGAGTGTTTGTGTTCGGTCTTAAATTTCGCTTGGTATTTATAAGTGTTTGTTAGTCTTATTATTTTACTTTATGTAAAATGTTCGTGTCGTATAATACTTGAATGGTTAAATTCTATATATGGTGATAATACATTTATGTATATGAATGCCCTATGATATGGTTAATATAAATTAATGGTGATAATACATATATGTATATGAAATATTGTACATACATTACAAAGAATAGTTTAACTAAGAATCCTGGCTTTGGGAGTCAGGGGTGGGAGTTAAAATCTCCTTTCTT…	MF352054	GGTATAGTAGGCACAGCCCTCAGCCTACTCATTCGAGCAGAACTAAGCCAACCGGGCGCTCTCCTTGGAGACGACCAAATTTATAATGTAATCGTTACAGCACATGCCTTCGTAATGATTTTCTTTATAGTAATGCCAATTATAATTGGAGGTTTTGGAAACTGATTAATTCCGCTAATGATTGGAGCCCCAGATATAGCATTTCCTCGTATAAATAACATAAGTTTCTGACTTCTGCCCCCTTCTTTCCTACTACTACTTGCCTCTTCTGGAGTAGAAGCGGGGGCCGGAACCGGGTGAACAGTGTACCCGCCCCTGGCTGGTAATTTAGCCCACGCAGGAGCATCAGTCGACCTGACAATCTTTTCACTTCACCTAGCAGGTATTTCCTCAATCCTC…	MF352107	this study
B_01	Sebastes	mentella	deep-pelagic	NA	Iceland, Reykjavík	GTCCCTCACCTTCAATAACCGTTGGCATTAAGAAATGGACTTGTTGGTCGGCTCTTACTACATTAAATATTTGAGTTTGATAGGATTTTGAGTAAAGGTATAACTTAACTTATGAGTGTTTGTGTTCGGTCTTAAATATTCGCTTGGTATTTATAAGTATTTGCTAGTCTTATTATTTTACTTTATGTAAGATGTTCGTGTCGTATAATACTTGAATGGTTAAATCCTATATATGGTGATAATACATATATGTATATGAATGCCCTATGATATGGTTAATATAAATTAATGGTGATAATACATATATGTATATGAAATATTGTACATACATTACAAAGAATAGTTTAACTAAGAATCCTGGCTTTGGGAGTCAGGGGTGGGAGTTAAAATCTCCTTTCT…	MF352055	NA	NA	this study
B_02	Sebastes	norvegicus	NA	NA	Iceland, Reykjavík	GTCCCTCACCTTCAATAACCGTTGGCATTAAGAAATGGACTTGTTGGTCGGCTCTTACTACATTAAATATTTGAGTTTGATAGGATTTTGAGTAAAGGTATAACTTAACTTATGAGTGTTTGTGTTCGGTCTTAAATTTCGCTTGGTATTTATAAGTGTTTGTTAGTCTTATTATTTTACTTTATGTAAAATGTTCGTGTCGTATAATACTTGAATGGTTAAATTCTATATATGGTGATAATACATTTATGTATATGAATGCCCTATGATATGGTTAATATAAATTAATGGTGATAATACATATATGTATATGAAATATTGTACATACATTACAAAGAATAGTTTAACTAAGAATCCTGGCTTTGGGAGTCAGGGGTGGGAGTTAAAATCTCCTTTCTT…	MF352056	GGTATAGTAGGCACAGCCCTCAGCCTACTCATTCGAGCAGAACTAAGCCAACCGGGCGCTCTCCTTGGAGACGACCAAATTTATAATGTAATCGTTACAGCACATGCCTTCGTAATGATTTTCTTTATAGTAATGCCAATTATAATTGGAGGTTTTGGAAACTGATTAATTCCGCTAATGATTGGAGCCCCAGATATAGCATTTCCTCGTATAAATAACAAAAGTTTCTGACTTCTGCCCCCTTCTTTCCTACTACTACTTGCCTCTTCTGGAGTAGAAGCGGGGGCCGGAACCGGGTGAACAGTGTACCCGCCCCTGGCTGGTAATTTAGCCCACGCAGGAGCATCAGTCGACCTGACAATCTTTTCACTTCACCTAGCAGGTATTTCCTCAATCCTC…	MF352108	this study
B_03	Sebastes	viviparus	NA	NA	Iceland, Reykjavík	GTCCCTCACCTTCAATAACCGTTGGCATTAAGAAATGGACTTGTTGGTCGGCTCTTACTACATTAAATATTTGAATTCAATAGGATTTTGAGTAAAGGTATAACTTAACTTATGAGTGTTTGTGTTCGGTCTTAAATTTCGCTTGGTATTTATAAGTGTTTATTGGTCTTATTATTCTGCTTTATGTAAAGTGTTCGTGTCGTATAACACTTGAATGGTTAAATTCTATATATGGTAATAATACATATATGTACATGAATGCCCTATGATATGGTTAATATAAATTAATGGTGATAATACATATATGTATATGAAATATTGTACATATATTACAAAGAATAGTTTAACTAAGAATCCTGGCTTTGGGAGTCAGGGGCTGGAGTTAAAATCTCCTTTCTA…	MF352057	GGTATAGTAGGCACAGCCCTCAGCCTACTCATTCGAGCAGAACTAAGCCAACCGGGCGCTCTCCTTGGAGACGACCAAATTTATAATGTAATCGTTACAGCACATGCCTTCGTAATGATTTTCTTTATAGTAATGCCAATTATAATTGGAGGTTTTGGAAACTGATTAATTCCGCTAATGATTGGAGCCCCAGATATAGCATTTCCTCGTATAAATAACATAAGTTTCTGACTTCTACCCCCTTCTTTCCTACTACTACTCGCCTCTTCTGGAGTAGAAGCGGGAGCCGGAACCGGATGAACAGTGTACCCACCCCTGGCTGGTAATTTAGCCCACGCAGGAGCATCAGTCGACCTGACAATCTTTTCACTTCACCTAGCAGGTATTTCCTCAATCCTC…	MF352109	this study
B_04	Sebastes	viviparus	NA	NA	Iceland, Reykjavík	GTCCCTCACCTTCAATAACCGTTGGCATTAAGAAATGGACTTGTTGGTCGGCTCTTACTACATTAAATATTTGAGTTTAATAGGATTTTGAGTAAAGGTATAACTTAACTTATGAGTGTTTGTGTTCGGTCTTAAATTTCGCTTGGTATTTATAAGTGTTTATTGGTCTTATTATTCTGCTTTATGTAAAGTGTTCGTGTCGTATAACACTTGAATGGTTAAATTCTATATATGGTAATAATACATATATGTACATGAATGTCCTATGATATGGTTAATATAAATTAATGGTGATAATACATATATGTATATGAAATATTGTACATATATTACAAAGAATAGTTTAACTAAGAATCCTGGCTTTGGGAGTCAGGGGCGGGAGTTAAAATCTCCTTTCTT…	MF352058	GGTATAGTAGGCACAGCCCTCAGCCTACTCATTCGAGCAGAACTAAGCCAACCGGGCGCTCTCCTTGGAGACGACCAAATTTATAATGTAATCGTTACAGCACATGCCTTCGTAATGATTTTCTTTATAGTAATGCCAATTATAATTGGAGGTTTTGGAAACTGATTAATTCCGCTAATGATTGGAGCCCCAGATATAGCATTTCCTCGTATAAATAACATAAGTTTCTGACTTCTACCCCCTTCTTTCCTACTACTACTCGCCTCTTCTGGAGTAGAAGCGGGAGCCGGAACCGGATGAACAGTGTACCCACCCCTGGCTGGTAATTTAGCCCACGCAGGAGCATCAGTCGACCTGACAATCTTTTCACTTCACCTAGCA	MF352110	this study
B_05	Sebastes	norvegicus	NA	NA	Iceland, Reykjavík	GTCCCTCACCTTCAATAACCGTTGGCATTAAGAAATGGACTTGTTGGTCGGCTCTTACTACATTAAATATTTGAGTTTGATAGGATTTTGAGTAAAGGTATAACTTAACTTATGAGTGTTTGTGTTCGGTCTTAAATTTCGCTTGGTATTTATAAGTGTTTGTTAGTCTTATTATTTTACTTTATGTAAAATGTTCGTGTCGTATAATACTTGAATGGTTAAATTCTATATATGGTGATAATACATTTATGTATATGAATGCCCTATGATATGGTTAATATAAATTAATGGTGATAATACATATATGTATATGAAATATTGTACATACATTACAAAGAATAGTTTAACTAAGAATCCTGGCTTTGGGAGTCAGGGGTGGGAGTTAAAATCTCCTTTCTT…	MF352059	GGTATAGTAGGCACAGCCCTCAGCCTACTCATTCGAGCAGAACTAAGCCAACCGGGCGCTCTCCTTGGAGACGACCAAATTTATAATGTAATCGTTACAGCACATGCCTTCGTAATGATTTTCTTTATAGTAATGCCAATTATAATTGGAGGTTTTGGAAACTGATTAATTCCGCTAATGATTGGAGCCCCAGATATAGCATTTCCTCGTATAAATAACATAAGTTTCTGACTTCTGCCCCCTTCTTTCCTACTACTACTTGCCTCTTCTGGAGTAGAAGCGGGGGCCGGAACCGGGTGAACAGTGTACCCGCCCCTGGCTGGTAATTTAGCCCACGCAGGAGCATCAGTCGACCTGACAATCTTTTCACTTCACCTAGCAGGTATTTCCTCAATCCTC…	MF352111	this study
B_06	Sebastes	mentella	deep-pelagic	NA	Iceland, Reykjavík	GTCCCTCACCTTCAATAACCGTTGGCATTAAGAAATGGACTTGTTGGTCGGCTCTTACTACATTAAATATTTGAGTTTTGATAGGATTTTGAGTAAAGGTATAACTTAACTTATGAGTGTTTGTGTTCGGTCTTAAATATTCGCTTGGTATTTATAAGTATTTGCTAGTCTTATTATTTTACTTTATGTAAGATGTTCGTGTCGTATAATACTTGAATGGTTAAATTCTATATATGGTGATAATACATATATGTATATGAATGCCCTATGATATGGTTAATATAAATTAATGGTGATAATACATATATGTATATGAAATATTGTACATACATTACAAAGAATAGTTTAACTAAGAATCCTGGCTTTGGGAGTCAGGGGTGGGAGTTAAAATCTCCTTTC…	MF352060	NA	NA	this study
B_07	Sebastes	mentella	shallow-pelagic	NA	Iceland, Reykjavík	GTCCCTCACCTTCAATAACCGTTGGCATTAAGAAATGGACTTGTTGGTCGGCTCTTACTACATTAAATATTTGAGTTTGATAGGATTTTGAGTAAAGGTATAACTTAACTTATGAGTGTTTGTGTTCGGTCTTAAATATTCGCTTGGTATTTATAAGTATTTGCTAGTCTTATTATTTTACTTTATGTAAGATGTTCGTGTCGTATAATACTTGAATGGTTAAATCCTATATATGGTGATAATACATATATGTATATGAATGCCCTATGATATGGTTAATATAAATTAATGGTGATAATACATATATGTATATGAAATATTGTACATATATTACAAAGAATAGTTTAACTAAGAATCCTGGCTTTGGGAGTCAGGGGTGGGAGTTAAAATCTCCTTTCT…	MF352061	NA	NA	this study
B_08	Sebastes	viviparus	NA	NA	Iceland, Reykjavík	GTCCCTCACCTTCAATAACCGTTGGCATTAAGAAATGGACTTGTTGGTCGGCTCTTACTACATTAAATATTTGAATTTAATAGGATTTTGAGTAAAGGTATAACTTAACTTATGAGTGTTTGTGTTCGGTCTTAAATTTCGCTTGGTATTTATAAGTGTTTATTGGTCTTATTATTCTGCTTTATGTAAAGTGTTCGTGTCGTATAACACTTGAATGGTTAAATTCTATATATGGTAATAATACATATATGTACATGAATGCCCTATGATATGGTTAATATAAATTAATGGTGATAATACATATATGTATATGAAATATTGTACATATATTACAAAGAATAGTTTAACTAAGAATCCTGGCTTTGGGAGTCAGGGGCGGGAGTTAAAATCTCCTTTCTT…	MF352062	GGTATAGTAGGCACAGCCCTCAGCCTACTCATTCGAGCAGAACTAAGCCAACCGGGCGCTCTCCTTGGAGACGACCAAATTTATAATGTAATCGTTACAGCACATGCCTTCGTAATGATTTTCTTTATAGTAATGCCAATTATAATTGGAGGTTTTGGAAACTGATTAATTCCGCTAATGATTGGAGCCCCAGATATAGCATTTCCTCGTATAAATAACAAAAGTTTCTGACTTCTACCCCCTTCTTTCCTACTACTACTCGCCTCTTCTGGAGTAGAAGCGGGGGCCGGAACCGGATGAACAGTGTACCCACCCCTGGCTGGTAATTTAGCCCACGCAGGAGCATCAGTCGACCTGACAATCTTTTCACTTCACCTAGCAGGTATTTCCTCAATCCTC…	MF352112	this study
B_09	Sebastes	norvegicus	NA	NA	Iceland, Reykjavík	GTCCCTCACCTTCAATAACCGTTGGCATTAAGAAATGGACTTGTTGGTCGGCTCTTACTACATTAAATATTTGAGTTTGATAGGATTTTGAGTAAAGGTATAACTTAACTTATGAGTGTTTGTGTTCGGTCTTAAATTTCGCTTGGTATTTATAAGTGTTTGTTAGTCTTATTATTTTACTTTATGTAAAATGTTCGTGTCGTATAATACTTGAATGGTTAAATTCTATATATGGTGATAATACATTTATGTATATGAATGCCCTATGATATGGTTAATATAAATTAATGGTGATAATACATATATGTATATGAAATATTGTACATACATTACAAAGAATAGTTTAACTAAGAATCCTGGCTTTGGGAGTCAGGGGTGGGAGTTAAAATCTCCTTTCTT…	MF352063	NA	NA	this study
B_10	Sebastes	mentella	deep-pelagic	NA	Iceland, Reykjavík	GTCCCTCACCTTCAATAACCGTTGGCATTAAGAAATGGACTTGTTGGTCGGCTCTTACTACATTAAATATTTGAGTTTTGATAGGATTTTGAGTAAAGGTATAACTTAACTTATGAGTGTTTGTGTTCGGTCTTAAATATTCGCTTGGTATTTATAAGTATTTGCTAGTCTTATTATTTTACTTTATGTAAGATGTTCGTGTCGTATAATACTTGAATGGTTAAATTCTATATATGGTGATAATACATATATGTATATGAATGCCCTATGATATGGTTAATATAAATTAATGGTGATAATACATATATGTATATGAAATATTGTACATACATTACAAAGAATAGTTTAACTAAGAATCCTGGCTTTGGGAGTCAGGGGTGGGAGTTAAAATCTCCTTTC…	MF352064	GGTATAGTAGGCACAGCCCTCAGCCTACTCATTCGAGCAGAACTAAGCCAACCGGGCGCTCTCCTTGGAGACGACCAAATTTATAATGTAATCGTTACAGCACATGCCTTCGTAATGATTTTCTTTATAGTAATGCCAATTATAATTGGAGGTTTTGGAAACTGATTAATTCCGCTAATGATTGGAGCCCCAGATATAGCATTTCCTCGTATAAATAACAAAAGTTTCTGACTTCTACCCCCTTCTTTCCTACTACTACTTGCCTCTTCTGGAGTAGAAGCGGGGGCCGGAACCGGGTGAACAGTGTACCCGCCCCTGGCTGGTAATTTAGCCCACGCAGGAGCATCAGTCGACCTGACAATCTTTTCACTTCACCTAGCAGGTATTTCCTCAATCCTC…	MF352113	this study
B_11	Sebastes	mentella	shallow-pelagic	NA	Iceland, Reykjavík	GTCCCTCACCTTCAATAACCGTTGGCATTAAGAAATGGACTTGTTGGTCGGCTCTTACTACATTAAATATTTGAGTTTGATAGGATTTTGAGTAAAGGTATAACTTAACTTATGAGTATTTGTGTTCGGTCTTAAATATTCGCTTGGTATTTATAAGTATTTGCTAGTCTTATTATTTTACTTTATGTAAGATGTTCGTGTCGTATAATACTTGAATGGTTAAATCCTATATATGGTGATAATACATATATGTATATGAATGCCCTATGATATGGTTAATATAAATTAATGGTGATAATACATATATGTATATGAAATATTGTACATATATTACAAAGAATAGTTTAACTAAGAATCCTGGCTTTGGGAGTCAGGGGTGGGAGTTAAAATCTCCTTTCT…	MF352065	GGTATAGTAGGCACAGCCCTCAGCCTACTCATTCGAGCAGAACTAAGCCAACCGGGCGCTCTCCTTGGAGACGACCAAATTTATAATGTAATCGTTACAGCACATGCCTTCGTAATGATTTTCTTTATAGTAATGCCAATTATAATTGGAGGTTTTGGAAACTGATTAATTCCGCTAATGATTGGAGCCCCAGATATAGCATTTCCTCGTATAAATAACATAAGTTTCTGACTTCTACCCCCTTCTTTCCTACTACTACTTGCCTCTTCTGGAGTAGAAGCGGGGGCCGGAACCGGGTGAACAGTGTACCCGCCCCTGGCTGGTAATTTAGCCCACGCAGGAGCATCAGTCGACCTGACAATCTTTTCACTTCACCTAGCAGGTATTTCCTCAATCCTC…	MF352114	this study
B_12	Sebastes	mentella	shallow-pelagic	NA	Iceland, Reykjavík	GTCCCTCACCTTCAATAACCGTTGGCATTAAGAAATGGACTTGTTGGTCGGCTCTTACTACATTAAATATTTGAGTTTGATAGGATTTTGAGTAAAGGTATAACTTAACTTATGAGTGTTTGTGTTCGGTCTTAAATATTCGCTTGGTATTTATAAGTATTTGCTAGTCTTATTATTTTACTTTATGTAAGATGTTCGTTTCGTATAATACTTGAATGGTTAAATCCTATATATGGTGATAATACATATATGTATATGAATGCCCTATGATATGGTTAATATAAATTAATGGTGATAATACATATATGTATATGAAATATTGTACATACATTACAAAGAATAGTTTAACTAAGAATCCTGGCTTTGGGAGTCAGGGGTGGGAGTTAAAATCTCCTTTCT…	MF352066	GGTATAGTAGGCACAGCCCTCAGCCTACTCATTCGAGCAGAACTAAGCCAACCGGGCGCTCTCCTTGGAGACGACCAAATTTATAATGTAATCGTTACAGCACATGCCTTCGTAATGATTTTCTTTATAGTAATGCCAATTATAATTGGAGGTTTTGGAAACTGATTAATTCCGCTAATGATTGGAGCCCCAGATATAGCATTTCCTCGTATAAATAACAAAAGTTTCTGACTTCTACCCCCTTCTTTCCTACTACTACTTGCCTCTTCTGGAGTAGAAGCGGGGGCCGGAACCGGGTGAACAGTGTACCCGCCCCTGGCTGGTAATTTAGCCCACGCAGGAGCATCAGTCGACCTGACAATCTTTTCACTTCACCTAGCAGGTATTTCCTCAATCCTC…	MF352115	this study
B_13	Sebastes	viviparus	NA	NA	Iceland, Reykjavík	GTCCCTCACCTTCAATAACCGTTGGCATTAAGAAATGGACTTGTTGGTCGGCTCTTACTACATTAAATATTTGAATTTAATAGGATTTTGAGTAAAGGTATAACTTAACTTATGAGTGTTTGTGTTCGGTCTTAAATTTCGCTTGGTATTTATAAGTGTTTGTTGGTCTTATTATTCTGCTTTATGTAAAGTGTTCGTGTCGTATAACACTTGAATGGTTAAATTCTATATATGGTAATAATACATATATGTACATGAATGCCCTATGATATGGTTAATATAAATTAATGGTGATAATACATATATGTATATGAAATATTGTACATATATTACAAAGAATAGTTTAACTAAGAATCCTGGCTTTGGGAGTCAGGGGCGGGAGTTAAAATCTCCTTTCTT…	MF352067	GGTATAGTAGGCACAGCCCTCAGCCTACTCATTCGAGCAGAACTAAGCCAACCGGGCGCTCTCCTTGGAGACGACCAAATTTATAATGTAATCGTTACAGCACATGCCTTCGTAATGATTTTCTTTATAGTAATGCCAATTATAATTGGAGGTTTTGGAAACTGATTAATTCCGCTAATGATTGGAGCCCCAGATATAGCATTTCCTCGTATAAATAACAAAAGTTTCTGACTTCTACCCCCTTCTTTCCTACTACTACTCGCCTCTTCTGGAGTAGAAGCGGGAGCCGGAACCGGATGAACAGTGTACCCACCCCTGGCTGGTAATTTAGCCCACGCAGGAGCATCAGTCGACCTGACAATCTTTTCACTTCACCTAGCAGGTATTTCCTCAATCCTC…	MF352116	this study
B_14	Sebastes	mentella	shallow-pelagic	NA	Iceland, Reykjavík	GTCCCTCACCTTCAATAACCGTTGGCATTAAGAAATGGACTTGTTGGTCGGCTCTTACTACATTAAATATTTGAGTTTGATAGGATTTTGAGTAAAGGTATAACTTAACTTATGAGTATTTGTGTTCGGTCTTAAATATTCGCTTGGTATTTATAAGTATTTGCTAGTCTTATTATTTTACTTTATGTAAGATGTTCGTGTCGTATAATACTTGAATGGTTAAATCCTATATATGGTGATAATACATATATGTATATGAATGCCCTATGATATGGTTAATATAAATTAATGGTGATAATACATATATGTATATGAAATATTGTACATATATTACAAAGAATAGTTTAACTAAGAATCCTGGCTTTGGGAGTCAGGGGTGGGAGTTAAAATCTCCTTTCT…	MF352068	GGTATAGTAGGCACAGCCCTCAGCCTACTCATTCGAGCAGAACTAAGCCAACCGGGCGCTCTCCTTGGAGACGACCAAATTTATAATGTAATCGTTACAGCACATGCCTTCGTAATGATTTTCTTTATAGTAATGCCAATTATAATTGGAGGTTTTGGAAACTGATTAATTCCGCTAATGATTGGAGCCCCAGATATAGCATTTCCTCGTATAAATAACATAAGTTTCTGACTTCTACCCCCTTCTTTCCTACTACTACTTGCCTCTTCTGGAGTAGAAGCGGGGGCCGGAACCGGGTGAACAGTGTACCCGCCCCTGGCTGGTAATTTAGCCCACGCAGGAGCATCAGTCGACCTGACAATCTTTTCACTTCACCTAGCAGGTATTTCCTCAATCCTC…	MF352117	this study
B_15	Sebastes	viviparus	NA	NA	Iceland, Reykjavík	GTCCCTCACCTTCAATAACCGTTGGCATTAAGAAATGGACTTGTTGGTCGGCTCTTACTACATTAAATATTTGAATTTAATAGGATTTTGAGTAAAGGTATAACTTAACTTATGAGTGTTTGTGTTCGGTCTTAAATTTCGCTTGGTATTTATAAGTGTTTATTGGTCTTATTATTCTGCTTTATGTAAAGTGTTCGTGTCGTATAACACTTGAATGGTTAAATTCTATATATGGTAATAATACATATATGTACATGAATGCCCTATGATATGGTTAATATAAATTAATGGTGATAATACATATATGTATATGAAATATTGTACATATATTACAAAGAATAGTTTAACTAAGAATCCTGGCTTTGGGAGTCAGGGGCGGGAGTTAAAATCTCCTTTCTT…	MF352069	GGTATAGTAGGCACAGCCCTCAGCCTACTCATTCGAGCAGAACTAAGCCAACCGGGCGCTCTCCTTGGAGACGACCAAATTTATAATGTAATCGTTACAGCACATGCCTTCGTAATGATTTTCTTTATAGTAATGCCAATTATAATTGGAGGTTTTGGAAACTGATTAATTCCGCTAATGATTGGAGCCCCAGATATAGCATTTCCTCGTATAAATAACATAAGTTTCTGACTTCTACCCCCTTCTTTCCTACTACTACTCGCCTCTTCTGGAGTAGAAGCGGGAGCCGGAACCGGATGAACAGTGTACCCACCCCTGGCTGGTAATTTAGCCCACGCAGGAGCATCAGTCGACCTGACAATCTTTTCACTTCACCTAGCAGGTATTTCCTCAATCCTC…	MF352118	this study
B_16	Sebastes	NA	NA	NA	Iceland, Reykjavík	GTCCCTCACCTTCAATAACCGTTGGCATTAAGAAATGGACTTGTTGGTCGGCTCTTACTACATTAAATATTTGAGTTTGATAGGATTTTGAGTAAAGGTATAACTTAACTTATGAGTGTTTGTGTTCGGTCTTAAATATTCGCTTGGTATTTATAAGTATTTGCTAGTCTTATTATTTTACTTTATGTAAGATGTTCGTGTCGTATAATACTTGAATGGTTAAATCCTATATATGGTGATAATACATATATGTATATGAATGCCCTATGATATGGTTAATATAAATTAATGGTGATAATACATATATGTATATGAAATATTGTACATATATTACAAAGAATAGTTTAACTAAGAATCCTGGCTTTGGGAGTCAGGGGTGGGAGTTAAAATCTCCTTTCT…	MF352070	NA	NA	this study
B_17	Sebastes	mentella	shallow-pelagic	NA	Iceland, Reykjavík	GTCCCTCACCTTCAATAACCGTTGGCATTAAGAAATGGACTTGTTGGTCGGCTCTTACTACATTAAATATTTGAGTTTGATAGGATTTTGAGTAAAGGTATAACTTAACTTATGAGTATTTGTGTTCGGTCTTAAATATTCGCTTGGTATTTATAAGTATTTGCTAGTCTTATTATTTTACTTTATGTAAGATGTTCGTGTCGTATAATACTTGAATGGTTAAATCCTATATATGGTGATAATACATATATGTATATGAATGCCCTATGATATGGTTAATATAAATTAATGGTGATAATACATATATGTATATGAAATATTGTACATATATTACAAAGAATAGTTTAACTAAGAATCCTGGCTTTGGGAGTCAGGGGTGGGAGTTAAAATCTCCTTTCT…	MF352071	NA	NA	this study
B_18	Sebastes	mentella	deep-pelagic	NA	Iceland, Reykjavík	GTCCCTCACCTTCAATAACCGTTGGCATTAAGAAATGGACTTGTTGGTCGGCTCTTACTACATTAAATATTTGAGTTTTGATAGGATTTTGAGTAAAGGTATAACTTAACTTATGAGTGTTTGTGTTCGGTCTTAAATATTCGCTTGGTATTTATAAGTATTTGCTAGTCTTATTATTTTACTTTATGTAAGATGTTCGTGTCGTATAATACTTGAATGGTTAAATTCTATATATGGTGATAATACATATATGTATATGAATGCCCTATGATATGGTTAATATAAATTAATGGTGATAATACATATATGTATATGAAATATTGTACATACATTACAAAGAATAGTTTAACTAAGAATCCTGGCTTTGGGAGTCAGGGGTGGGAGTTAAAATCTCCTTTC…	MF352072	GGTATAGTAGGCACAGCCCTCAGCCTACTCATTCGAGCAGAACTAAGCCAACCGGGCGCTCTCCTTGGAGACGACCAAATTTATAATGTAATCGTTACAGCACATGCCTTCGTAATGATTTTCTTTATAGTAATGCCAATTATAATTGGAGGTTTTGGAAACTGATTAATTCCGCTAATGATTGGAGCCCCAGATATAGCATTTCCTCGTATAAATAACATAAGTTTCTGACTTCTACCCCCTTCTTTCCTACTACTACTTGCCTCTTCTGGAGTAGAAGCGGGGGCCGGAACCGGGTGAACAGTGTACCCGCCCCTGGCTGGAAATTTAGCCCACGCAGGAGCATCAGTCGACCTGACAATCTTTTCACTTCACCTAGCAGGTATTTCCTCAATCCTC…	MF352119	this study
B_19	Sebastes	NA	NA	NA	Iceland, Reykjavík	GTCCCTCACCTTCAATAACCGTTGGCATTAAGAAATGGACTTGTTGGTCGGCTCTTACTACATTAAATATTTGAGTTTGATAGGATTTTGAGTAAAGGTATAACTTAACTTATGAGTGTTTGTGTTCGGTCTTAAATTTCGCTTGGTATTTATAAGTGTTTGTTAGTCTTATTATTTTACTTTATGTAAAATGTTCGTGTCGTATAATACTTGAATGGTTAAATTCTATATATGGTGATAATACATTTATGTATATGAATGCCCTATGATATGGTTAATATAAATTAATGGTGATAATACATATATGTATATGAAATATTGTACATACATTACAAAGAATAGTTTAACTAAGAATCCTGGCTTTGGGAGTCAGGGGTGGGAGTTAAAATCTCCTTTCTT…	MF352073	GGTATAGTAGGCACAGCCCTCAGCCTACTCATTCGAGCAGAACTAAGCCAACCGGGCGCTCTCCTTGGAGACGACCAAATTTATAATGTAATCGTTACAGCACATGCCTTCGTAATGATTTTCTTTATAGTAATGCCAATTATAATTGGAGGTTTTGGAAACTGATTAATTCCGCTAATGATTGGAGCCCCAGATATAGCATTTCCTCGTATAAATAACATAAGTTTCTGACTTCTACCCCCTTCTTTCCTACTACTACTTGCCTCTTCTGGAGTAGAAGCGGGGGCCGGAACCGGGTGAACAGTGTACCCGCCCCTGGCTGGAAATTTAGCCCACGCAGGAGCATCAGTCGACCTGACAATCTTTTCACTTCACCTAGCAGGTATTTCCTCAATCCTC…	MF352120	this study
B_20	Sebastes	mentella	deep-pelagic	NA	Iceland, Reykjavík	GTCCCTCACCTTCAATAACCGTTGGCATTAAGAAATGGACTTGTTGGTCGGCTCTTACTACATTAAATATTTGAGTTTGATAGGATTTTGAGTAAAGGTATAACTTAACTTATGAGTGTTTGTGTTCGGTCTTAAATATTCGCTTGGTATTTATAAGTATTTGCTAGTCTTATTATTTTACTTTATGTAATATGTTCGTGTCGTATAATACTTGAATGGTTAAATTCTATATATGGTGATAATACATATATGTATATGAATGCCCTATGATATGGTTAATATAAATTAATGGTGATAATACATATATGTATATGAAATATTGTACATACATTACAAAGAATAGTTTAACTAAGAATCCTGGCTTTGGGAGTCAGGGGTGGGAGTTAAAATCTCCTTTCT…	MF352074	GGTATAGTAGGCACAGCCCTCAGCCTACTCATTCGAGCAGAACTAAGCCAACCGGGCGCTCTCCTTGGAGACGACCAAATTTATAATGTAATCGTTACAGCACATGCCTTCGTAATGATTTTCTTTATAGTAATGCCAATTATAATTGGAGGTTTTGGAAACTGATTAATTCCGCTAATGATTGGAGCCCCAGATATAGCATTTCCTCGTATAAATAACATAAGTTTCTGACTTCTACCCCCTTCTTTCCTACTACTACTTGCCTCTTCTGGAGTAGAAGCGGGGGCCGGAACCGGGTGAACAGTGTACCCGCCCCTGGCTGGTAATTTAGCCCACGCAGGAGCATCAGTCGACCTGACAATCTTTTCACTTCACCTAGCAGGTATTTCCTCAATCCTC…	MF352121	this study
B_21	Sebastes	mentella	deep-pelagic	NA	Iceland, Reykjavík	GTCCCTCACCTTCAATAACCGTTGGCATTAAGAAATGGACTTGTTGGTCGGCTCTTACTACATTAAATATTTGAGTTTTGATAGGATTTTGAGTAAAGGTATAACTTAACTTATGAGTGTTTGTGTTCGGTCTTAAATATTCGCTTGGTATTTATAAGTATTTGCTAGTCTTATTATTTTACTTTATGTAAGATGTTCGTGTCGTATAATACTTGAATGGTTAAATTCTATATATGGTGATAATACATATATGTATATGAATGCCCTATGATATGGTTAATATAAATTAATGGTGATAATACATATATGTATATGAAATATTGTACATACATTACAAAGAATAGTTTAACTAAGAATCCTGGCTTTGGGAGTCAGGGGTGGGAGTTAAAATCTCCTTTC…	MF352075	GGTATAGTAGGCACAGCCCTCAGCCTACTCATTCGAGCAGAACTAAGCCAACCGGGCGCTCTCCTTGGAGACGACCAAATTTATAATGTAATCGTTACAGCACATGCCTTCGTAATGATTTTCTTTATAGTAATGCCAATTATAATTGGAGGTTTTGGAAACTGATTAATTCCGCTAATGATTGGAGCCCCAGATATAGCATTTCCTCGTATAAATAACATAAGTTTCTGACTTCTACCCCCTTCTTTCCTACTACTACTTGCCTCTTCTGGAGTAGAAGCGGGGGCCGGAACCGGGTGAACAGTGTACCCGCCCCTGGCTGGAAATTTAGCCCACGCAGGAGCATCAGTCGACCTGACAATCTTTTCACTTCACCTAGCAGGTATTTCCTCAATCCTC…	MF352122	this study
B_22	Sebastes	mentella	deep-pelagic	NA	Iceland, Reykjavík	GTCCCTCACCTTCAATAACCGTTGGCATTAAGAAATGGACTTGTTGGTCGGCTCTTACTACATTAAATATTTGAGTTTTGATAGGATTTTGAGTAAAGGTATAACTTAACTTATGAGTGTTTGTGTTCGGTCTTAAATATTCGCTTGGTATTTATAAGTATTTGCTAGTCTTATTATTTTACTTTATGTAAGATGTTCGTGTCGTATAATACTTGAATGGTTAAATTCTATATATGGTGATAATACATATATGTATATGAATGCCCTATGATATGGTTAATATAAATTAATGGTGATAATACATATATGTATATGAAATATTGTACATACATTACAAAGAATAGTTTAACTAAGAATCCTGGCTTTGGGAGTCAGGGGTGGGAGTTAAAATCTCCTTTC…	MF352076	GGTATAGTAGGCACAGCCCTCAGCCTACTCATTCGAGCAGAACTAAGCCAACCGGGCGCTCTCCTTGGAGACGACCAAATTTATAATGTAATCGTTACAGCACATGCCTTCGTAATGATTTTCTTTATAGTAATGCCAATTATAATTGGAGGTTTTGGAAACTGATTAATTCCGCTAATGATTGGAGCCCCAGATATAGCATTTCCTCGTATAAATAACAAAAGTTTCTGACTTCTACCCCCTTCTTTCCTACTACTACTTGCCTCTTCTGGAGTAGAAGCGGGGGCCGGAACCGGGTGAACAGTGTACCCGCCCCTGGCTGGAAATTTAGCCCACGCAGGAGCATCAGTCGACCTGACAATCTTTTCACTTCACCTAGCAGGTATTTCCTCAATCCTC…	MF352123	this study
B_23	Sebastes	mentella	deep-pelagic	NA	Iceland, Reykjavík	GTCCCTCACCTTCAATAACCGTTGGCATTAAGAAATGGACTTGTTGGTCGGCTCTTACTACATTAAATATTTGAGTTTTGATAGGATTTTGAGTAAAGGTATAACTTAACTTATGAGTGTTTGTGTTCGGTCTTAAATATTCGCTTGGTATTTATAAGTATTTGCTAGTCTTATTATTTTACTTTATGTAAGATGTTCGTGTCGTATAATACTTGAATGGTTAAATTCTATATATGGTGATAATACATATATGTATATGAATGCCCTATGATATGGTTAATATAAATTAATGGTGATAATACATATATGTATATGAAATATTGTACATACATTACAAAGAATAGTTTAACTAAGAATCCTGGCTTTGGGAGTCAGGGGTGGGAGTTAAAATCTCCTTTC…	MF352077	GGTATAGTAGGCACAGCCCTCAGCCTACTCATTCGAGCAGAACTAAGCCAACCGGGCGCTCTCCTTGGAGACGACCAAATTTATAATGTAATCGTTACAGCACATGCCTTCGTAATGATTTTCTTTATAGTAATGCCAATTATAATTGGAGGTTTTGGAAACTGATTAATTCCGCTAATGATTGGAGCCCCAGATATAGCATTTCCTCGTATAAATAACATAAGTTTCTGACTTCTACCCCCTTCTTTCCTACTACTACTTGCCTCTTCTGGAGTAGAAGCGGGGGCCGGAACCGGGTGAACAGTGTACCCGCCCCTGGCTGGAAATTTAGCCCACGCAGGAGCATCAGTCGACCTGACAATCTTTTCACTTCACCTAGCAGGTATTTCCTCAATCCTC…	MF352124	this study
B_24	Sebastes	mentella	shallow-pelagic	NA	Iceland, Reykjavík	GTCCCTCACCTTCAATAACCGTTGGCATTAAGAAATGGACTTGTTGGTCGGCTCTTACTACATTAAATATTTGAGTTTGATAGGATTTTGAGTAAAGGTATAACTTAACTTATGAGTGTTTGTGTTCGGTCTTAAATATTCGCTTGGTATTTATAAGTATTTGCTAGTCTTATTATTTTACTTTATGTAAGATGTTCGTGTCGTATAATACTTGAATGGTTAAATCCTATATATGGTGATAATACATATATGTATATGAATGCCCTATGATATGGTTAATATAAATTAATGGTGATAATACATATATGTATATGAAATATTGTACATATATTACAAAGAATAGTTTAACTAAGAATCCTGGCTTTGGGAGTCAGGGGTGGGAGTTAAAATCTCCTTTCT…	MF352078	GGTATAGTAGGCACAGCCCTCAGCCTACTCATTCGAGCAGAACTAAGCCAACCGGGCGCTCTCCTTGGAGACGACCAAATTTATAATGTAATCGTTACAGCACATGCCTTCGTAATGATTTTCTTTATAGTAATGCCAATTATAATTGGAGGTTTTGGAAACTGATTAATTCCGCTAATGATTGGAGCCCCAGATATAGCATTTCCTCGTATAAATAACATAAGTTTCTGACTTCTACCCCCTTCTTTCCTACTACTACTTGCCTCTTCTGGAGTAGAAGCGGGGGCCGGAACCGGGTGAACAGTGTACCCGCCCCTGGCTGGTAATTTAGCCCACGCAGGAGCATCAGTCGACCTGACAATCTTTTCACTTCACCTAGCAGGTATTTCCTCAATCCTC…	MF352125	this study
B_25	Sebastes	mentella	shallow-pelagic	NA	Iceland, Reykjavík	GTCCCTCACCTTCAATAACCGTTGGCATTAAGAAATGGACTTGTTGGTCGGCTCTTACTACATTAAATATTTGAGTTTGATAGGATTTTGAGTAAAGGTATAACTTAACTTATGAGTGTTTGTGTTCGGTCTTAAATATTCGCTTGGTATTTATAAGTATTTGTTAGTCTTATTATTTTACTTTATGTAAGATGTTCGTGTCGTATAATACTTGAATGGTTAAATCCTATATATGGTGATAATACATATATGTATATGAATGCCCTATGATATGGTTAATATAAATTAATGGTGATAATACATATATGTATATGAAATATTGTACATACATTACAAAGAATAGTTTAACTAAGAATCCTGGCTTTGGGAGTCAGGGGTGGGAGTTAAAATCTCCTTTCT…	MF352079	GGTATAGTAGGCACAGCCCTCAGCCTACTCATTCGAGCAGAACTAAGCCAACCGGGCGCTCTCCTTGGAGACGACCAAATTTATAATGTAATCGTTACAGCACATGCCTTCGTAATGATTTTCTTTATAGTAATGCCAATTATAATTGGAGGTTTTGGAAACTGATTAATTCCGCTAATGATTGGAGCCCCAGATATAGCATTTCCTCGTATAAATAACATAAGTTTCTGACTTCTACCCCCTTCTTTCCTACTACTACTTGCCTCTTCTGGAGTAGAAGCGGGGGCCGGAACCGGGTGAACAGTGTACCCGCCCCTGGCTGGTAATTTAGCCCACGCAGGAGCATCAGTCGACCTGACAATCTTTTCACTTCACCTAGCAGGTATTTCCTCAATCCTC…	MF352126	this study
B_26	Sebastes	mentella	deep-pelagic	NA	Iceland, Reykjavík	GTCCCTCACCTTCAATAACCGTTGGCATTAAGAAATGGACTTGTTGGTCGGCTCTTACTACATTAAATATTTGAGTTTTGATAGGATTTTGAGTAAAGGTATAACTTAACTTATGAGTGTTTGTGTTCGGTCTTAAATATTCGCTTGGTATTTATAAGTATTTGCTAGTCTTATTATTTTACTTTATGTAAGATGTTCGTGTCGTATAATACTTGAATGGTTAAATTCTATATATGGTGATAATACATATATGTATATGAATGCCCTATGATATGGTTAATATAAATTAATGGTGATAATACATATATGTATATGAAATATTGTACATACATTACAAAGAATAGTTTAATTAAGAATCCTGGCTTTGGGAGTCAGGGGTTGGAGTTAAAATCTCCTTTC…	MF352080	GGTATAGTAGGCACAGCCCTCAGCCTACTCATTCGAGCAGAACTAAGCCAACCGGGCGCTCTCCTTGGAGACGACCAAATTTATAATGTAATCGTTACAGCACATGCCTTCGTAATGATTTTCTTTATAGTAATGCCAATTATAATTGGAGGTTTTGGAAACTGATTAATTCCGCTAATGATTGGAGCCCCAGATATAGCATTTCCTCGTATAAATAACATAAGTTTCTGACTTCTACCCCCTTCTTTCCTACTACTACTTGCCTCTTCTGGAGTAGAAGCGGGGGCCGGAACCGGGTGAACAGTGTACCCGCCCCTGGCTGGAAATTTAGCCCACGCAGGAGCATCAGTCGACCTGACAATCTTTTCACTTCACCTAGCAGGTATTTCCTCAATCCTC…	MF352127	this study
B_27	Sebastes	mentella	shallow-pelagic	NA	Iceland, Reykjavík	GTCCCTCACCTTCAATAACCGTTGGCATTAAGAAATGGACTTGTTGGTCGGCTCTTACTACATTAAATATTTGAGTTTGATAGGATTTTGAGTAAAGGTATAACTTAACTTATGAGTGTTTGTGTTCGGTCTTAAACATTCGCTTGGTATTTATAAGTATTTGCTAGTCTTATTATTTTACTTTATGTAAGATGTTCGTGTCGTATAATACTTGAATGGTTAAATCCTATATATGGTGATAATACATATATGTATATGAATGCCCTATGATATGGTTAATATAAATTAATGGTGATAATACATATATGTATATGAAATATTGTACATATATTACAAAGAGTAGTTTAACTAAGAATCCTGGCTTTGGGAGTCAGGGGTGGGAGTTAAAATCTCCTTTCT…	MF352081	GGTATAGTAGGCACAGCCCTCAGCCTACTCATTCGAGCAGAACTAAGCCAACCGGGCGCTCTCCTTGGAGACGACCAAATTTATAATGTAATCGTTACAGCACATGCCTTCGTAATGATTTTCTTTATAGTAATGCCAATTATAATTGGAGGTTTTGGAAACTGATTAATTCCGCTAATGATTGGAGCCCCAGATATAGCATTTCCTCGTATAAATAACATAAGTTTCTGACTTCTACCCCCTTCTTTCCTACTACTACTTGCCTCTTCTGGAGTAGAAGCGGGGGCCGGAACCGGGTGAACAGTGTACCCGCCCCTGGCTGGTAATTTAGCCCACGCAGGAGCATCAGTCGACCTGACAATCTTTTCACTTCACCTAGCAGGTATTTCCTCAATCCTC…	MF352128	this study
B_28	Sebastes	mentella	shallow-pelagic	NA	Iceland, Reykjavík	GTCCCTCACCTTCAATAACCGTTGGCATTAAGAAATGGACTTGTTGGTCGGCTCTTACTACATTAAATATTTGAGTTTGATAGGATTTTGAGTAAAGGTATAACTTAACTTATGAGTGTTTGTGTTCGGTCTTAAATATTCGCTTGGTATTTATAAGTATTTGCTAGTCTTATTATTTTACTTTATGTAAGATGTTCGTGTCGTATAATACTTGAATGGTTAAATCCTATATATGGTGATAATACATATATGTATATGAATGCCCTATGATATGGTTAATATAAATTAATGGTGATAATACATATATGTATATGAAATATTGTAC	MF352082	GGTATAGTAGGCACAGCCCTCAGCCTACTCATTCGAGCAGAACTAAGCCAACCGGGCGCTCTCCTTGGAGACGACCAAATTTATAATGTAATCGTTACAGCACATGCCTTCGTAATGATTTTCTTTATAGTAATGCCAATTATAATTGGAGGTTTTGGAAACTGATTAATTCCGCTAATGATTGGAGCCCCAGATATAGCATTTCCTCGTATAAATAACATAAGTTTCTGACTTCTACCCCCTTCTTTCCTACTACTACTTGCCTCTTCTGGAGTAGAAGCGGGGGCCGGAACCGGGTGAACAGTGTACCCGCCCCTGGCTGGAAATTTAGCCCACGCAGGAGCATCAGTCGACCTGACAATCTTTTCACTTCACCTAGCAGGTATTTCCTCAATCCTC…	MF352129	this study
B_29	Sebastes	mentella	deep-pelagic	NA	Iceland, Reykjavík	GTCCCTCACCTTCAATAACCGTTGGCATTAAGAAATGGACTTGTTGGTCGGCTCTTACTACATTAAATATTTGAGTTTTGATAGGATTTTGAGTAAAGGTATAACTTAACTTATGAGTGTTTGTGTTCGGTCTTAAATATTCGCTTGGTATTTATAAGTATTTGCTAGTCTTATTATTTTACTTTATGTACGATGTTCGTGTCGTATAATACTTGAATGGTTAAATTCTATATATGGTGATAATACATATATGTATATGAATGCCCTATGATATGGTTAATATAAATTAATGGTGATAATACATATATGTATATGAAATATTGT	MF352083	NA	NA	this study
Reference samples
refDP_1	Sebastes	mentella	deep-pelagic			GTCCCTCACCTTCAATAACCGTTGGCATTAAGAAATGGACTTGTTGGTCGGCTCTTACTACATTAAATATTTGAGTTTTGATAGGATTTTGAGTAAAGGTATAACTTAACTTATGAGTGTTTGTGTTCGGTCTTAAATATTCGCTTGGTATTTATAAGTATTTGCTAGTCTTATTATTTTACTTTATGTAAGATGTTCGTGTCGTACAATACTTGAATGGTTAAATTCTATATATGGTGATAATACATATATGTATATGAATGCCCTATGATATGGTTAATATAAATTAATGGTGATAATACATATATGTATATGAAATATTGTACATCCATTACAAAGAATAGTTTAACTAAGAATCCTGGCTTTGGGAGTCAGGGGTGGGAGTTAAAATCTCCTTTC…	MF352084	GGTATAGTAGGCACAGCCCTCAGCCTACTCATTCGAGCAGAACTAAGCCAACCGGGCGCTCTCCTTGGAGACGACCAAATTTATAATGTAATCGTTACAGCACATGCCTTCGTAATGATTTTCTTTATAGTAATGCCAATTATAATTGGAGGTTTTGGAAACTGATTAATTCCGCTAATGATTGGAGCCCCAGATATAGCATTTCCTCGTATAAATAACATAAGTTTCTGACTTCTACCCCCTTCTTTCCTACTACTACTTGCCTCTTCTGGAGTAGAAGCGGGGGCCGGAACCGGGTGAACAGTGTACCCGCCCCTGGCTGGAAATTTAGCCCACGCAGGAGCATCAGTCGACCTGACAATCTTTTCACTTCACCTAGCAGGTATTTCCTCAATCCTC…	MF352130
refDP_13	Sebastes	mentella	deep-pelagic			GTCCCTCACCTTCAATAACCGTTGGCATTAAGAAATGGACTTGTTGGTCGGCTCTTACTACATTAAATATTTGAGTTTTGATAGGATTTTGAGTAAAGGTATAACTTAACTTATGAGTGTTTGTGTTCGGTCTTAAATATTCGCTTGGTATTTATAAGTATTTGCTAGTCTTATTATTTTACTTTATGTAAGATGTTCGTGTCGTATAATACTTGAATGGTTAAATTCTATATATGGTGATAATACATATATGTATATGAATGCCCTATGATATGGTTAATATAAATTAATGGTGATAATACATATATGTATATGAAATATTGTACATACATTACAAAGAATAGTTTAACTAAGAATCCTGGCTTTGGGAGTCAGGGGTGGGAGTTAAAATCTCCTTTC…	MF352085	GGTATAGTAGGCACAGCCCTCAGCCTACTCATTCGAGCAGAACTAAGCCAACCGGGCGCTCTCCTTGGAGACGACCAAATTTATAATGTAATCGTTACAGCACATGCCTTCGTAATGATTTTCTTTATAGTAATGCCAATTATAATTGGAGGTTTTGGAAACTGATTAATTCCGCTAATGATTGGAGCCCCAGATATAGCATTTCCTCGTATAAATAACATAAGTTTCTGACTTCTACCCCCTTCTTTCCTACTACTACTTGCCTCTTCTGGAGTAGAAGCGGGGGCCGGAACCGGGTGAACAGTGTACCCGCCCCTGGCTGGAAATTTAGCCCACGCAGGAGCATCAGTCGACCTGACAATCTTTTCACTTCACCTAGCAGGTATTTCCTCAATCCTC…	MF352131
refSP_9	Sebastes	mentella	shallow-pelagic			GTCCCTCACCTTCAATAACCGTTGGCATTAAGAAATGGACTTGTTGGTCGGCTCTTACTACATTAAATATTTGAGTTTGATAGGATTTTGAGTAAAGGTATAACTTAACTTATGAGTGTTTGTGTTCGGTCTTAAATATTCGCTTGGTATTTATAAGTATTTGCTAGTCTTATTATTTTACTTTATGTAAGATGTTCGTGTCGTATAATACTTGAATGGTTAAATCCTATATATGGTGATAATACATATATGTATATGAATGCCCTATGATATGGTTAATATAAATTAATGGTGATAATACATATATGTATATGAAATATTGTACATACATTACAAAGAATAGTTTAACTAAGAATCCTGGCTTTGGGAGTCAGGGGTGGGAGTTAAAATCTCCTTTCT…	MF352086	GGTATAGTAGGCACAGCCCTCAGCCTACTCATTCGAGCAGAACTAAGCCAACCGGGCGCTCTCCTTGGAGACGACCAAATTTATAATGTAATCGTTACAGCACATGCCTTCGTAATGATTTTCTTTATAGTAATGCCAATTATAATTGGAGGTTTTGGAAACTGATTAATTCCGCTAATGATTGGAGCCCCAGATATAGCATTTCCTCGTATAAATAACATAAGTTTCTGACTTCTACCCCCTTCTTTCCTACTACTACTTGCCTCTTCTGGAGTAGAAGCGGGGGCCGGAACCGGGTGAACAGTGTACCCGCCCCTGGCTGGTAATTTAGCCCACGCAGGAGCATCAGTCGACCTGACAATCTTTTCACTTCACCTAGCAGGTATTTCCTCAATCCTC…	MF352132
refSP_16	Sebastes	mentella	shallow-pelagic			GTCCCTCACCTTCAATAACCGTTGGCATTAAGAAATGGACTTGTTGGTCGGCTCTTACTACATTAAATATTTGAGTTTGATAGGATTTTGAGTAAAGGTATAACTTAACTTATGAGTGTTTGTGTTCGGTCTTAAATATTCGCTTGGTATTTATAAGTATTTGCTAGTCTTATTATTTTACTTTATGTAAGATGTTCGTGTCGTATAATACTTGAATGGTTAAATCCTATATATGGTGATAATACATATATGTATATGAATGCCCTGTGATATGGTTAATATAAATTAATGGTGATAATACATATATGTATATGAAATATTGTACATATATTACAAAGAATAGTTTAACTAAGAATCCTGGCTTTGGGAGTCAGGGGTGGGAGTTAAAATCTCCTTTCT…	MF352087	GGTATAGTAGGCACAGCCCTCAGCCTACTCATTCGAGCAGAACTAAGCCAACCGGGCGCTCTCCTTGGAGACGACCAAATTTATAATGTAATCGTTACAGCACATGCCTTCGTAATGATTTTCTTTATAGTAATGCCAATTATAATTGGAGGTTTTGGAAACTGATTAATTCCGCTAATGATTGGAGCCCCAGATATAGCATTTCCTCGTATAAATAACATAAGTTTCTGACTTCTACCCCCTTCTTTCCTACTACTACTTGCCTCTTCTGGAGTAGAAGCGGGGGCCGGAACCGGGTGAACAGTGTACCCGCCCCTGGCTGGTAATTTAGCCCACGCAGGAGCATCAGTCGACCTGACAATCTTTTCACTTCACCTAGCAGGTATTTCCTCAATCCTC…	MF352133
S.norvegicus	Sebastes	norvegicus	NA			GTCCCTCACCTTCAATAACCGTTGGCATTAAGAAATGGACTTGTTGGTCGGCTCTTACTACATTAAATATTTGAGTTTGATAGGATTTTGAGTAAAGGTATAACTTAACTTATGAGTGTTTGTGTTCGGTCTTAAATTTCGCTTGGTATTTATAAGTGTTTGTTAGTCTTATTATTTTACTTTATGTAAAATGTTCGTGTCGTATAATACTTGAATGGTTAAATTCTATATATGGTGATAATACATTTATGTATATGAATGCCCTATGATATGGTTAATATAAATTAATGGTGATAATACATATATGTATATGAAATATTGTACATACATTACAAAGAATAGTTTAACTAAGAATCCTGGCTTTGGGAGTCAGGGGTGGGAGTTAAAATCTCCTTTCTT…	MF352088	GGTATAGTAGGCACAGCCCTCAGCCTACTCATTCGAGCAGAACTAAGCCAACCGGGCGCTCTCCTTGGAGACGACCAAATTTATAATGTAATCGTTACAGCACATGCCTTCGTAATGATTTTCTTTATAGTAATGCCAATTATAATTGGAGGTTTTGGAAACTGATTAATTCCGCTAATGATTGGAGCCCCAGATATAGCATTTCCTCGTATAAATAACATAAGTTTCTGACTTCTGCCCCCTTCTTTCCTACTACTACTTGCCTCTTCTGGAGTAGAAGCGGGGGCCGGAACCGGGTGAACAGTGTACCCGCCCCTGGCTGGTAATTTAGCCCACGCAGGAGCATCAGTCGACCTGACAATCTTTTCACTTCACCTAGCAGGTATTTCCTCAATCCTC…	MF352134
S.fasciatus	Sebastes	fasciatus	NA			GTCCCTCACCTTCAATAACCGTTGACATTAAGAAATGGACTTGTTGGTCGGCTCTTACTACATTAAATATTTGAGTTTGATAGGATTTTGAGTAAAGGTATAACTTAACTTATGAGTGTTTGTGTTCGGTCTTAAATTTCGCTTGGTATTTATAAGTGTTTGTTAGTCTTATTATTTTACTTTATGTAAAATGTTCGTGTCGTATAATACTTGAATGGTTAAATTCTATATATGGTGATAATACATATATGTATATGAATGCCCTATGATATGGTTAATATAAATTAATGGTGATAATACATATATGTATATGAAATATTGTACATACATACAAAGAATAGTTTAACTAAGAATCCTGGCTTTGGGAGTCAGGGGTGGGAGTTAAAATCTCCTTTCTTT…	MF352089	GGTATAGTAGGCACAGCCCTCAGCCTACTCATTCGAGCAGAACTAAGCCAACCGGGCGCTCTCCTTGGAGACGACCAAATTTATAATGTAATCGTTACAGCACATGCCTTCGTAATGATTTTCTTTATAGTAATGCCAATTATAATTGGAGGTTTTGGAAACTGATTAATTCCGCTAATGATTGGAGCCCCAGATATAGCATTTCCTCGTATAAATAACATAAGTTTCTGACTTCTACCCCCTTCTTTCCTACTACTACTTGCCTCTTCTGGAGTAGAAGCGGGGGCCGGAACCGGGTGAACAGTGTACCCGCCCCTGGCTGGTAATTTAGCCCACGCAGGAGCATCAGTCGACCTGACAATCTTTTCACTTCACCTAGCAGGTATTTCCTCAATCCTC…	MF352135
S.viviparus	Sebastes	viviparus	NA			GTCCCTCACCTTCAATAACCGTTGGCATTAAGAAATGGACTTGTTGGTCGGCTCTTACTACATTAAATATTTGAATTTAATAGGATTTTGAGTAAAGGTATAACTTAACTTATGAGTGTTTGTGTTCGGTCTTAAATTTCGCTTGGTATTTATAAGTGTTTATTGGTCTTATTATTCTGCTTTATGTAAAGTGTTCGTGTCGTATAACACTTGAATGGTTAAATTCTATATATGGTAATAATACATATATGTACATGAATGCCCTATGATATGGTTAATATAAATTAATGGTGATAATACATATATGTATATTAAATATTGTACATATATTACAAAGAATAGTTTAACTAAGAATCCTGGCTTTGGGAGTCAGGGGCGGGAGTTAAAATCTCCTTTCTT…	MF352090	GGTATAGTAGGCACAGCCCTCAGCCTACTCATTCGAGCAGAACTAAGCCAACCGGGCGCTCTCCTTGGAGACGACCAAATTTATAATGTAATCGTTACAGCACATGCCTTCGTAATGATTTTCTTTATAGTAATGCCAATTATAATTGGAGGTTTTGGAAACTGATTAATTCCGCTAATGATTGGAGCCCCAGATATAGCATTTCCTCGTATAAATAACATAAGTTTCTGACTTCTACCCCCTTCTTTCCTACTACTACTCGCCTCTTCTGGAGTAGAAGCGGGGGCCGGAACCGGATGAACAGTGTACCCACCCCTGGCTGGTAATTTAGCCCACGCAGGAGCATCAGTCGACCTGACAATCTTTTCACTTCACCTAGCAGGTATTTCCTCAATCCTC…	MF352136
Hyde & Vetter, 2007
S.mentella_HV	Sebastes	mentella					DQ678558		DQ678352	Hyde & Vetter (2007)
S.norvegicus_HV	Sebastes	norvegicus					DQ678555		DQ678349	Hyde & Vetter (2007)
S.fasciatus_HV	Sebastes	fasciatus					DQ678547		DQ678341	Hyde & Vetter (2007)
S.viviparus_HV	Sebastes	viviparus					DQ678580		DQ678374	Hyde & Vetter (2007)
S.alutus_HV	Sebastes	alutus					DQ678519		DQ678313	Hyde & Vetter (2007)
S.crameri_HV	Sebastes	crameri					DQ678540		DQ678334	Hyde & Vetter (2007)
S.ciliatus_HV	Sebastes	ciliatus					DQ678618		DQ678412	Hyde & Vetter (2007)
S.reedi_HV	Sebastes	reedi					DQ678518		DQ678312	Hyde & Vetter (2007)
S.polyspinis_HV	Sebastes	polyspinis					DQ678615		DQ678409	Hyde & Vetter (2007)
S.aleutianus_HV	Sebastes	aleutianus					DQ678521		DQ678315	Hyde & Vetter (2007)
S.variabilis_HV	Sebastes	variabilis					DQ678613		DQ678407	Hyde & Vetter (2007)
Artamonova et al. (2013)
M-A1	Sebastes	mentella					JQ846241			Artamonova et al. (2013)
M-A2	Sebastes	mentella					JQ846242			Artamonova et al. (2013)
M-A3	Sebastes	mentella					JQ846243			Artamonova et al. (2013)
M-A4	Sebastes	mentella					JQ846244			Artamonova et al. (2013)
M-A5	Sebastes	mentella					JQ846245			Artamonova et al. (2013)
M-A6	Sebastes	mentella					JQ846246			Artamonova et al. (2013)
M-AB	Sebastes	mentella					JQ846247			Artamonova et al. (2013)
M-B1	Sebastes	mentella					JQ846248			Artamonova et al. (2013)
M-B2	Sebastes	mentella					JQ846249			Artamonova et al. (2013)
M-B3	Sebastes	mentella					JQ846250			Artamonova et al. (2013)
M-B4	Sebastes	mentella					JQ846251			Artamonova et al. (2013)
M-hb1	Sebastes	mentella					JQ846252			Artamonova et al. (2013)
M-Gb2	Sebastes	mentella					JQ846253			Artamonova et al. (2013)
MR1	Sebastes	marinus					JQ846254			Artamonova et al. (2013)
MR2	Sebastes	marinus					JQ846255			Artamonova et al. (2013)
MR3	Sebastes	marinus					JQ846256			Artamonova et al. (2013)
MR4	Sebastes	marinus					JQ846257			Artamonova et al. (2013)
MR5	Sebastes	marinus					JQ846258			Artamonova et al. (2013)
MR6	Sebastes	marinus					JQ846259			Artamonova et al. (2013)
F1	Sebastes	fasciatus					JQ846260			Artamonova et al. (2013)
F2	Sebastes	fasciatus					JQ846261			Artamonova et al. (2013)
V1	Sebastes	viviparus					JQ846262			Artamonova et al. (2013)
V2	Sebastes	viviparus					JQ846263			Artamonova et al. (2013)
V3	Sebastes	viviparus					JQ846264			Artamonova et al. (2013)
References
Artamonova VS, Makhrov AA, Karabanov DP, Rolskiy AY, Bakay YI & Popov VI (2013) Hybridization of beaked redfish (Sebastes mentella) with small redfish (Sebastes viviparus) and diversification of redfish (Actinopterygii: Scorpaeniformes) in the Irminger Sea. Journal of Natural History, 47:1791-1801.
Hyde J, Vetter RD (2007) The origin, evolution, and diversification of rockfishes of the genus Sebastes (Curvier). Molecular Phylogenetics, 44: 790-811.
